# Supplementary material for: Feeding the future
Source: Springer Nature journal article supplement (doi:10.1038/499023a), 2013-07-02
Supplement: 41586_2013_BF499023a_MOESM1_ESM.pdf [file 41586_2013_BF499023a_MOESM1_ESM.pdf]

## Supplementary information to: Feeding the future

Full list of co-authors to a Comment published in Nature **499**, 23–24 (2013);  
<http://dx.doi.org/10.1038/499023a>.

**Susan McCouch** Cornell University, Ithaca, New York, USA.  
[mccouch@cornell.edu](mailto:mccouch@cornell.edu)

**Gregory J. Baute** University of British Columbia, Vancouver, British Columbia, Canada.

**James Bradeen** University of Minnesota, St. Paul, Minnesota, USA.

**Paula Bramel** Global Crop Diversity Trust, Bonn, Germany.

**Peter K. Bretting** United States Department of Agriculture (USDA), Beltsville, Maryland, USA.

**Edward Buckler** United States Department of Agriculture (USDA); and Cornell University, Ithaca, New York, USA.

**John M. Burke** University of Georgia, Athens, Georgia, USA.

**David Charest** Genome BC, Vancouver, British Columbia, Canada.

**Sylvie Cloutier** Agriculture and Agri-Food Canada, Manitoba Winnipeg, Canada.

**Glenn Cole** Pioneer, Woodland, California, USA.

**Hannes Dempewolf** Global Crop Diversity Trust, Bonn, Germany.

**Michael Dingkuhn** Centre de coopération internationale en recherche agronomique pour le développement (CIRAD), France; and the International Rice Research Institute (IRRI), Los Baños, the Philippines.

**Catherine Feuillet** Institut National de la Recherche Agronomique (INRA), Clermont-Ferrand, France.

**Paul Gepts** University of California at Davis, Davis, California, USA.

**Dario Grattapaglia** Empresa Brasileira de Pesquisa Agropecuária (EMBRAPA), Brazil.

**Luigi Guarino** Global Crop Diversity Trust, Bonn, Germany.

**Scott Jackson** University of Georgia, Athens, Georgia, USA.

**Sandra Knapp** Natural History Museum, London, UK.

**Peter Langridge** Australian Centre for Plant Functional Genomics (ACPGF), Adelaide, Australia.

**Amy Lawton-Rauh** Clemson University, Clemson, South Carolina, USA.

**Qui Lijua** Chinese Academy of Agricultural Sciences, Beijing, China.

**Charlotte Lusty** Global Crop Diversity Trust, Bonn, Germany.

**Todd Michael** Monsanto Company, Creve Coeur Missouri, USA.

**Sean Myles** Dalhousie University, Halifax, Nova Scotia, Canada.

**Ken Naito** National Institute of Agrobiological Sciences, Tsukuba, Japan.

**Randall L. Nelson** United States Department of Agriculture (USDA); and the University of Illinois, Urbana Illinois, USA.

**Reno Pontarollo** Genome Prairie, Saskatoon, Saskatchewan, Canada.

**Christopher M. Richards** Colorado State University, Fort Collins, Colorado; and the United States Department of Agriculture (USDA), Fort Collins, Colorado, USA.

**Loren Rieseberg** University of British Columbia, Vancouver, British Columbia, Canada.

**Jeffrey Ross-Ibarra** University of California at Davis, Davis, California, USA.

**Steve Rounsley** DowAgro, Indianapolis, Indiana, USA.

**Ruaraidh Sackville Hamilton** International Rice Research Institute (IRRI), Los Baños, the Philippines.

**Ulrich Schurr** Forschungszentrum Jülich, Jülich, Germany.

**Nils Stein** Leibniz-Institut für Pflanzengenetik und Kulturpflanzenforschung (IPK), Gatersleben, Germany.

**Norihiko Tomooka** National Institute of Agrobiological Sciences, Tsukuba, Japan.

**Esther van der Knaap** Ohio State University, Wooster, Ohio, USA.

**David van Tassel** Land Institute, Salina, Kansas, USA.

**Jane Toll** Global Crop Diversity Trust, Bonn, Germany.

**Jose Valls** Empresa Brasileira de Pesquisa Agropecuária (EMBRAPA), Brazil.

**Rajeev K. Varshney** International Crops Research Institute for the Semi-Arid Tropics (ICRISAT), Patancheru, India.

**Judson Ward** Driscoll's, Watsonville, California, USA.

**Robbie Waugh** James Hutton Institute, Dundee, UK.

**Peter Wenzl** International Maize and Wheat Improvement Center (CIMMYT), El Batán, Mexico.

**Daniel Zamir** Hebrew University of Jerusalem, Rehovot, Israel.
